# Supplementary material for: Genotypes of SLC22A4 and SLC22A5 regulatory loci are predictive of the response of chronic myeloid leukemia patients to imatinib treatment
Source: J Exp Clin Cancer Res. 2017 Apr 18;36:55. doi: 10.1186/s13046-017-0523-3 (PMC5395939; doi:10.1186/s13046-017-0523-3)
Supplement: Supplementary file 3 — PCR cycling conditions for the amplification of the promoter regions. (XLSX 11 kb) [file 13046_2017_523_MOESM3_ESM.xlsx]

## Sheet: List1
Supplementary Table S3. PCR cycling conditions for the amplification of the promoter regions.
a. Protocol for amplification of promoters of ABCB11 and SLC22A1 genes
Mater Mix	Volume	Cycling conditions
Total volume per sample	20μl	94°C for 2min 35 cycles of 94°C for 15s, of 63.5°C for 30s and 68°C for 1.5 min
AccuPrime™SuperMix I	10μl
Forward primer (10μM/μl)	0.5μl
Reverse primer (10μM/μl)	0.5μl
H2O	8.0μl
DNA (50-100ng)	1.0μl
b. Protocol for amplification of promoters of ABCB1, SLC22A2, SLC22A8, SLCO1A2 genes
Mater Mix	Volume	Cycling conditions
Total volume per sample	20μl	94°C for 2min 35 cycles of 94°C for 15s, of 59.3°C for 30s and 68°C for 1.5 min
AccuPrime™SuperMix I	10μl
Forward primer (10μM/μl)	0.5μl
Reverse primer (10μM/μl)	0.5μl
H2O	8.0μl
DNA (50-100ng)	1.0μl
c. Protocol for amplification of promoters of ABCC5, ABCG5, SLC22A3, SLC22A4, SLC22A5, SLC22A7, SLC28A1, SLC28A2, SLC28A3, SLC29A2, SLC29A3, SLC47A1, SLC47A2 genes
Mater Mix	Volume	Cycling conditions
Total volume per sample	25μl	95°C for 1min 35 cycles of 95°C for 30s, of 62.2°C for 30s and 72°C for 1.0 min and 13s 5min hold at 72°C
FastStart High Fidelity Enzyme Blend 5U/μl	0.25μl
100% DMSO	1.5μl
10x Buffer with 18 mM MgCl2	2.5μl
dNTPs (10μM)	0.5μl
Forward primer (10μM/μl)	2.0μl
Reverse primer (10μM/μl)	2.0μl
H2O	15.25μl
DNA (50-100ng)	1.0μl
