# Supplementary material for: Genotypes of SLC22A4 and SLC22A5 regulatory loci are predictive of the response of chronic myeloid leukemia patients to imatinib treatment
Source: J Exp Clin Cancer Res. 2017 Apr 18;36:55. doi: 10.1186/s13046-017-0523-3 (PMC5395939; doi:10.1186/s13046-017-0523-3)
Supplement: Supplementary file 4 — Identified SNPs in amplified region including whole promoters of 19 selected genes in the cohort of 83 CML patients. (XLSX 20 kb) [file 13046_2017_523_MOESM4_ESM.xlsx]

## Sheet: List1
Supplementary Table S4. Identified SNPs in amplified region including whole promoters of 19 selected genes in the cohort of 83 CML patients.
Gene	SNP no.	Annotation	SNP ID	Position (Assembly GRCh38.p2)	Position of TSS	Distance from TSS	Nucleotide substitution	MAF/MinorAlleleCount (Global)	Strand
ABCB1	1	YES	rs4148727	Ch.7; 87713450	Ch.7; 87713323	-127	A/G	G=0.0639/320	Reverse
	2	YES	rs562417804	Ch.7; 87713530		-207	A/G	NA
	3	NO	NA	Ch.7; 87713808		-485	T/C	NA
	4	YES	rs28381714	Ch.7; 87714150		-827	T/C	C=0.0044/22
ABCB11	5	YES	rs13416851	Ch.2; 169031103	Ch.2; 169031293	190	T/A	A=0.0711/356	Reverse
	6	YES	rs568098536	Ch.2; 169031294		-1	A/G	G=0.0044/22
	7	YES	rs114352891	Ch.2; 169031926		-633	A/G	G=0.0028/14
	8	YES	rs144239146	Ch.2; 169032035		-742	C/T	T=0.0020/10
	9	YES	rs77027514	Ch.2; 169032160		-867	T/C	C=0.0036/18
	10	YES	rs115998826	Ch.2; 169032229		-936	G/A	A=0.0038/19
ABCC5	11	YES	rs9869029	Ch.3; 184017498	Ch.3; 184017939	441	G/C	C=0.3117/1561	Reverse
	12	NO	NA	Ch.3; 184017843		96	C/G	NA
	13	YES	rs56843723	Ch.3; 184017856		83	G/A	A=0.0134/67
	14	YES	rs60553229	Ch.3; 184018121		-182	G/A	A=0.0046/23
	15	YES	rs59502966	Ch.3; 184018302		-363	G/C	C=0.0008/4
ABCG5	16	NO	NA	Ch.2; 43839624	Ch.2; 43838819	-805	T/A	NA	Reverse
	17	YES	rs11887534	Ch.2; 43839108		-289	G/C	C=0.0605/303
	18	NO	NA	Ch.2; 43839056		-237	C/A	NA
	19	YES	rs3806471	Ch.2; 43839035		-216	T/G	G=0.4894/2451
	20	YES	rs55853083	Ch.2; 43838797		22	T/G	G=0.0192/96
SLC22A1	21	YES – exon1	rs1867351	Ch.6; 160122091	Ch.6; 160121831	260	T/C	C=0.2812/1408	Forward
	22	YES – exon1	rs12208357	Ch.6; 160122116		285	C/T	T=0.0204/102
SLC22A2	23	YES	rs55920607	Ch.6; 160259003	Ch.6; 160258931	-72	G/A	A=0.0136/68	Reverse
	24	YES	rs60249401	Ch.6; 160259181		-250	C/T	T=0.0072/36
SLC22A3	25	NO	NA	Ch.6; 160347795	Ch.6; 160348373	-578	C/A	NA	Forward
	26	YES	rs551032	Ch.6; 160347828		-545	T/C	NA
	27	NO	NA	Ch.6; 160348198		-175	T/G	NA
	28	YES	rs555754	Ch.6; 160348391		18	G/A	A=0.4301/2154
SLC22A4	29	YES	rs460089	Ch.5; 132294079	Ch.5; 132294452	-373	G/C	C=0.3175/1590	Forward
	30	YES	rs460271	Ch.5; 132294369		-83	G/C	C=0.3169/1587
SLC22A5	31	YES	rs2631369	Ch.5; 132369574	Ch.5; 132369709	-135	G/C	C=0.3564/1785	Forward
	32	YES	rs2631368	Ch.5; 132369605		-104	T/G	G=0.3564/1785
	33	YES	rs2631367	Ch.5; 132369766		57	G/C	C=0.2670/1337
	34	YES – exon1	rs2631365	Ch.5; 132370257		548	T/C	C=0.4862/2435
	35	YES	rs4646298	Ch.5; 132369527		-182	C/T	T=0.1172/587
	36	YES	rs13180169	Ch.5; 132369834		125	G/T	T=0.1182/592
	37	YES	rs13180186	Ch.5; 132369866		157	G/T	T=0.1190/596
	38	YES – exon1	rs13180043	Ch.5; 132369895		186	C/T	T=0.1190/596
	39	YES – exon1	rs13180295	Ch.5; 132369896		187	G/A	A=0.1188/595
	40	YES	rs60978556	Ch.5; 132369654		-55	C/A	A=0.0030/15
	41	YES – exon1	rs369724970	Ch.5; 132369947		238	G/A	NA
	42	YES – exon1	rs202088921	Ch.5; 132370108		399	C/T	NA
SLC22A7	43	YES	rs17209379	Ch.6; 43297493	Ch.6; 43298260	-767	A/C	C=0.0521/261	Forward
	44	YES	rs527536195	Ch.6; 43297871		-389	C/T	T=0.0004/2
	45	YES	rs70953674	Ch.6; 43297948		-312	C/G	G=0.0138/69
	46	NO	NA	Ch.6; 43298134		-126	C/G	NA
SLC22A8	47	YES – exon1	rs548209219	Ch.11; 63015662	Ch.11; 63015845	183	C/T	T=0.0002/1	Reverse
	48	YES	rs4963227	Ch.11; 63015678		167	T/C	C=0.0984/493
	49	YES	rs3809069	Ch.11; 63016300		-455	A/G	G=0.1823/913
	50	YES	rs147652943	Ch.11; 63016338		-493	G/T	T=0.0010/5
	51	YES	rs948979	Ch.11; 63016354		-509	G/T	T=0.2762/1383
	52	YES	rs948980	Ch.11; 63016417		-572	C/G	G=0.2738/1371
	53	YES	rs575301877	Ch.11; 63016494		-649	G/A	A=0.0012/6
SLC28A1	54	YES	rs113290327	Ch.15; 84884202	Ch.15; 84884661	-459	C/T	T=0.0114/57	Forward
	55	YES	rs1451537	Ch.15; 84884439		-222	A/G	G=0.0491/246
	56	YES	rs59738243	Ch.15; 84884751		90	G/A	A=0.0923/462
	57	YES – intron1	rs12910396	Ch.15; 84884872		211	C/T	T=0.4287/2147
SLC28A2	58	YES	rs750247657	Ch.15; 45251272	Ch.15; 45252230	-958	T/C	NA	Forward
	59	YES	rs28524974	Ch.15; 45251330		-900	C/T	T=0.3948/1977
	60	YES	rs2413777	Ch.15; 45251356		-874	C/T	T=0.1180/591
	61	YES	rs3759895	Ch.15; 45251672		-558	G/A	A=0.4766/2387
	62	YES	rs2413776	Ch.15 ;45251972		-258	A/G	G=0.4942/2475
	63	YES	rs2413775	Ch.15; 45252090		-140	T/A	A=0.4876/2442
	64	YES	rs2899376	Ch.15; 45252121		-109	G/T	T=0.0527/264
	65	YES	rs536462691	Ch.15; 45252145		-85	G/A	A=0.0002/1
SLC28A3	66	YES – intron1	rs62566622	Ch.9; 84368139	Ch.9; 84368498	359	G/T	T=0.0138/69	Reverse
	67	YES	rs10868153	Ch.9; 84368453		45	T/G	G=0.1615/809
	68	YES	rs7023720	Ch.9; 84368594		-96	G/T	T=0.1056/529
	69	YES	rs12378361	Ch.9; 84368757		-259	G/T	T=0.1212/607
	70	YES	rs146575608	Ch.9; 84369163		-665	G/T	T=0.0016/8
SLC29A2	71	YES	rs534979238	Ch.11; 66372019	Ch.11; 66372476	457	C/A	A=0.0002/1	Reverse
	72	YES	rs72557994	Ch.11; 66372169		307	G/C	C=0.0373/187
	73	YES	rs12281049	Ch.11; 66372383		93	A/G	G=0.0753/377
SLC29A3	74	YES	rs10999768	Ch.10; 71318450	Ch.10; 71319253	-803	T/C	C=0.1372/687	Forward
	75	YES	rs181262940	Ch.10; 71318666		-587	G/A	A=0.0086/43
	76	YES	rs4747148	Ch.10; 71318690		-563	T/G	G=0.2091/1047
	77	YES	rs67346255	Ch.10; 71318902		-351	G/A	A=0.0178/89
	78	YES	rs72542476	Ch.10; 71318950		-303	T/C	C=0.0018/9
	79	YES	rs7924115	Ch.10; 71319105		-148	G/C	C=0.4028/2017
	80	YES	rs72542477	Ch.10; 71319119		-134	C/G	G=0.0284/142
	81	YES	rs72542481	Ch.10; 71319247		-6	C/T	T=0.1086/544
	82	YES	rs17525188	Ch.10; 71319390		137	G/A	A=0.4824/2416
	83	YES	rs41300554	Ch.10; 71319472		219	T/C	C=0.4836/2422
	84	YES	rs7067937	Ch.10; 71319545		292	C/G	G=0.4824/2416
SLC47A1	85	YES	rs548503955	Ch.17; 19533060	Ch.17; 19533854	-794	A/G	G=0.0002/1	Forward
	86	YES	rs111369428	Ch.17; 19533393		-461	G/C	C=0.0076/38
	87	YES	rs2252281	Ch.17; 19533874		20	T/C	C=0.3035/1520
	88	YES	rs61733934	Ch.17; 19534026		172	C/T	T=0.0080/40
SLC47A2	89	YES – intron1	rs4925045	Ch.17; 19716128	Ch.17;19716730	602	G/C	C=0.3133/1569	Reverse
	90	YES	rs12943590	Ch.17; 19716685		45	G/A	A=0.3155/1580
	91	YES	rs34834489	Ch.17; 19716951		-221	G/A	A=0.2694/1349
SLCO1A2	92	YES – exon1	rs10841795	Ch.12; 21334610	Ch.12; 21334898	288	A/G	G=0.0515/258	Reverse
	93	YES	rs3764043	Ch.12; 21335070		-172	C/T	T=0.0877/439
	94	YES	rs58502637	Ch.12; 21335091		-193	A/G	G=0.0276/138
	95	YES	rs61364007	Ch.12; 21335141		-243	G/A	A=0.0118/59
